# Supplementary material for: MMP-9 as Prognostic Marker for Brain Tumours: A Comparative Study on Serum-Derived Small Extracellular Vesicles
Source: Cancers (Basel). 2023 Jan 24;15(3):712. doi: 10.3390/cancers15030712 (PMC9913777; doi:10.3390/cancers15030712)
Supplement: Supplementary file 1 [file cancers-15-00712-s001.zip]

Archive with 5 entries (5 files):
- Figure S1 Characterisation of serum-isolated particles.jpg
- Figure S2 Comparison of all the preoperative and the postoperative GBM and BM samples in terms of MMP-9 level .jpg
- Figure S3 Differences among controls and various CNS tumour patients based on MMP-9 level of sEVs originated from preoperative serum samples .jpg
- Supplementary Figures for MMP-9 as a prognostic marker for brain tumours-revision.pdf
- Table S1 Detailed patient characteristics.xlsx
