# Supplementary material for: MMP-9 as Prognostic Marker for Brain Tumours: A Comparative Study on Serum-Derived Small Extracellular Vesicles
Source: Cancers (Basel). 2023 Jan 24;15(3):712. doi: 10.3390/cancers15030712 (PMC9913777; doi:10.3390/cancers15030712)
Supplement: Supplementary file 1 [file cancers-15-00712-s001.zip › Table S1 Detailed patient characteristics.xlsx]

## Sheet: Table S1
No	ID	Group	Subgroup	preoperative/ postoperative	Age	Gender	Survival (Months)	Recurrance	Therapy administered	MMP9 concentration (ng/ml)	Protein concentration (ug/ul)	MMP-9 (ng/ml) / protein concentration (ng/ml)	MMP-9 ppm	log10 (MMP-9 ppm)
1	S507	GBM	Primary glioblastoma	preoperative	68	male				4.87906	2.0575	1.97613e-05	19.7613	1.29582
2	S508	BM	BM adenocarcinoma	postoperative	77	female				9.61353	1.6325	4.51478e-05	45.1478	1.65464
3	S512	GBM	Primary glioblastoma	preoperative	72	male	10			4.51776	2.49573	1.58392e-05	15.8392	1.19973
4	S514	BM	BM adenocarcinoma	preoperative	82	female				6.814	3.2835	1.8677e-05	18.677	1.27131
5	S515	GBM	Primary glioblastoma	preoperative	66	male	3		+	3.21989	1.51612	2.12378e-05	21.2378	1.32711
6	S517	GBM	Primary glioblastoma	preoperative	38	female				5.41161	1.3575	3.18916e-05	31.8916	1.50368
7	S520	GBM	Primary glioblastoma	postoperative	38	female	8			7.13611	1.545	4.05431e-05	40.5431	1.60792
8	S525	BM	BM adenocarcinoma	preoperative	76	female				6.68313	1.745	3.82987e-05	38.2987	1.58318
9	S529	GBM	Secondary glioblastoma	preoperative	48	female				2.80891	2.57	9.59378e-06	9.59378	0.98199
10	S531	GBM	Primary glioblastoma	preoperative	65	male				5.25561	2.145	2.17793e-05	21.7793	1.33804
11	S532	GBM	Primary glioblastoma	postoperative	65	male				4.67387	1.955	2.07196e-05	20.7196	1.31638
12	S533	GBM	Secondary glioblastoma	postoperative	48	female	4			16.6235	1.565	0.00010032	100.32	2.00139
13	S537	GBM	Primary glioblastoma	preoperative	82	male				2.46474	1.27	1.74667e-05	17.4667	1.24221
14	S538	GBM	Primary glioblastoma	preoperative	58	male			+	4.46099	2.17	1.80906e-05	18.0906	1.25745
15	S539	GBM	Primary glioblastoma	postoperative	82	male				6.05008	1.66	3.23967e-05	32.3967	1.5105
16	S543	M	Meningeoma Grade I.	preoperative	69	female				2.89619	1.87689	1.2516e-05	12.516	1.09747
17	S549	GBM	Primary glioblastoma	postoperative	55	male	0		+	8.20548	1.175	6.44023e-05	64.4023	1.8089
18	S550	GBM	Primary glioblastoma	preoperative	67	male				9.27483	2.02	4.33642e-05	43.3642	1.63713
19	S553	GBM	Secondary glioblastoma	postoperative	49	male	22			6.50911	1.1	5.32563e-05	53.2563	1.72637
20	S556	CTRL	CTRL	preoperative	48	male				2.94168	1.94141	1.43105e-05	14.3105	1.15565
21	S558	BM	BM Carcinoma planocellulare	preoperative	64	male				6.92213	1.7325	3.6847e-05	36.847	1.5664
22	S560	BM	BM adenocarcinoma	preoperative	64	female				4.32057	2.54582	1.58398e-05	15.8398	1.19975
23	S561	GBM	Primary glioblastoma	preoperative	69	female				8.35715	2.045	3.72337e-05	37.2337	1.57094
24	S565	GBM	Primary glioblastoma	postoperative	69	female				8.03091	1.57795	4.58052e-05	45.8052	1.66091
25	S566	BM	BM Carcinoma planocellulare	postoperative	64	male				24.56	4.7325	5.08585e-05	50.8585	1.70636
26	S568	GBM	Primary glioblastoma	preoperative	66	male	3			2.18605	1.48556	1.38979e-05	13.8979	1.14295
27	S570	CTRL	CTRL	preoperative	26	male				4.13327	1.46345	2.57328e-05	25.7328	1.41049
28	S571	BM	BM Carcinoma planocellulare	postoperative	52	male				9.10684	1.8575	4.24904e-05	42.4904	1.62829
29	S579	M	Meningeoma Grade I.	preoperative	39	female				4.5805	1.89387	2.25735e-05	22.5735	1.3536
30	S581	GBM	Primary glioblastoma	postoperative	60	male	23			13.4026	2.08	4.07233e-05	40.7233	1.60984
31	S584	M	Meningeoma Grade II.	preoperative	64	female				2.43089	1.81068	1.20828e-05	12.0828	1.08217
32	S595	M	Meningeoma Grade I.	preoperative	46	female				5.98818	1.71391	3.22213e-05	32.2213	1.50814
33	S596	GBM	Primary glioblastoma	preoperative	64	male				2.87007	2.2325	1.19988e-05	11.9988	1.07914
34	S597	GBM	Primary glioblastoma	preoperative	72	female				9.78161	1.645	5.41771e-05	54.1771	1.73382
35	S598	GBM	Primary glioblastoma	postoperative	64	male				2.25699	1.34	1.47846e-05	14.7846	1.16981
36	S599	GBM	Primary glioblastoma	preoperative	58	female				11.2383	2.6075	3.97477e-05	39.7477	1.59931
37	S601	BM	BM adenocarcinoma	preoperative	49	male	108			3.38701	2.395	1.2885e-05	12.885	1.11008
38	S605	M	Meningeoma Grade II.	preoperative	59	female	63			5.51613	1.7075	3.01516e-05	30.1516	1.47931
39	S607	GBM	Primary glioblastoma	postoperative	58	female				6.44989	1.285	4.51743e-05	45.1743	1.65489
40	S608	BM	BM adenocarcinoma	preoperative	65	male				8.11676	3.19	2.05978e-05	20.5978	1.31382
41	S609	CTRL	CTRL	preoperative	46	female				5.38627	1.5297	3.1299e-05	31.299	1.49553
42	S610	BM	BM Carcinoma planocellulare	preoperative	61	male				5.04101	1.9075	2.46655e-05	24.6655	1.39209
43	S611	BM	BM adenocarcinoma	postoperative	65	male				20.1702	7.015	2.69559e-05	26.9559	1.43065
44	S616	CTRL	CTRL	preoperative	41	female				4.23047	1.8336	2.14056e-05	21.4056	1.33053
45	S622	GBM	Primary glioblastoma	preoperative	64	male	5			6.32493	1.13666	5.13168e-05	51.3168	1.71026
46	S623	M	Meningeoma Grade I.	preoperative	58	female				1.31757	0.758058	1.6029e-05	16.029	1.20491
47	S624	M	Meningeoma Grade I.	preoperative	55	female				3.07488	1.67146	1.69655e-05	16.9655	1.22957
48	S627	BM	BM adenocarcinoma	postoperative	57	female				24.2443	2.2575	9.42683e-05	94.2683	1.97437
49	S629	BM	BM adenocarcinoma	postoperative	64	female				23.9625	12.195	1.96495e-05	19.6495	1.29335
50	S634	M	Meningeoma Grade I.	preoperative	54	female				2.25441	1.9499	1.07909e-05	10.7909	1.03306
51	S635	M	Meningeoma Grade I.	preoperative	65	female				3.02866	1.64345	1.72001e-05	17.2001	1.23553
52	S637	BM	BM adenocarcinoma	preoperative	62	female				6.37343	1.99913	3.01098e-05	30.1098	1.47871
53	S640	M	Meningeoma Grade I.	preoperative	33	female				2.703	2.50592	1.01872e-05	10.1872	1.00806
54	S641	BM	BM Carcinoma planocellulare	preoperative	58	female				9.53878	2.0325	4.32811e-05	43.2811	1.6363
55	S642	BM	BM Carcinoma planocellulare	preoperative	53	male				6.97406	1.73	3.62812e-05	36.2812	1.55968
56	S643	CTRL	CTRL	preoperative	47	female				1.64134	2.20966	7.18044e-06	7.18044	0.856151
57	S646	GBM	Primary glioblastoma	postoperative	38	female	3			3.56095	1.72	1.91505e-05	19.1505	1.28218
58	S649	CTRL	CTRL	preoperative	71	female				3.15783	2.04752	1.43945e-05	14.3945	1.1582
59	S650	BM	BM adenocarcinoma	preoperative	64	male	19			2.29768	2.245	1.01323e-05	10.1323	1.00571
60	S651	M	Meningeoma Grade I.	preoperative	60	female				3.10841	1.77588	1.61421e-05	16.1421	1.20796
61	S653	GBM	Secondary glioblastoma	preoperative	43	male	4	+	+	7.33738	4.63878	1.49387e-05	14.9387	1.17431
62	S655	CTRL	CTRL	preoperative	42	male				3.61583	2.12307	1.58957e-05	15.8957	1.20128
63	S657	CTRL	CTRL	preoperative	35	female				4.40528	1.50848	2.66077e-05	26.6077	1.42501
64	S663	CTRL	CTRL	preoperative	52	female				1.80868	1.98216	8.4151e-06	8.4151	0.925059
65	S664	M	Meningeoma Grade I.	preoperative	66	female				3.4876	2.17995	1.4932e-05	14.932	1.17412
66	S669	GBM	Primary glioblastoma	preoperative	64	male	4	+		2.00638	1.37	1.3506e-05	13.506	1.13053
67	S670	CTRL	CTRL	preoperative	59	female				1.82025	2.29879	7.21446e-06	7.21446	0.858204
68	S671	M	Meningeoma Grade I.	preoperative	30	female				3.25954	2.19098	1.38853e-05	13.8853	1.14255
69	S672	GBM	Primary glioblastoma	preoperative	49	male				3.85937	1.52	2.25694e-05	22.5694	1.35352
70	S673	M	Meningeoma Grade I.	preoperative	45	male				0.807842	2.35821	3.15921e-06	3.15921	0.499579
71	S675	M	Meningeoma Grade I.	preoperative	75	female				5.55787	2.21305	2.28817e-05	22.8817	1.35949
72	S676	M	Meningeoma Grade I.	preoperative	59	female				3.78976	2.39726	1.44035e-05	14.4035	1.15847
73	S677	CTRL	CTRL	preoperative	20	male				2.12008	2.22748	8.88331e-06	8.88331	0.948575
74	S678	GBM	Primary glioblastoma	postoperative	64	male	4	+		1.83396	0.67	2.43312e-05	24.3312	1.38616
75	S681	GBM	Primary glioblastoma	preoperative	55	female	0	+	+	4.52684	3.26904	1.30783e-05	13.0783	1.11655
76	S682	M	Meningeoma Grade II.	preoperative	62	male	49			2.90091	1.5825	2.07754e-05	20.7754	1.31755
77	S684	CTRL	CTRL	preoperative	62	female				1.99862	1.91849	9.60743e-06	9.60743	0.982607
78	S685	BM	BM adenocarcinoma	preoperative	70	male				10.0559	2.16042	4.24084e-05	42.4084	1.62745
79	S687	M	Meningeoma Grade I.	preoperative	69	female				7.32251	2.295	2.97793e-05	29.7793	1.47391
80	S688	M	Meningeoma Grade I.	preoperative	44	female				2.25485	1.495	1.44122e-05	14.4122	1.15873
81	S689	GBM	Primary glioblastoma	postoperative	55	female	0	+	+	2.07888	0.925	2.09761e-05	20.9761	1.32172
82	S690	CTRL	CTRL	preoperative	60	female				5.32722	2.59166	2.43726e-05	24.3726	1.3869
83	S692	CTRL	CTRL	preoperative	71	female				0.48182	1.53988	2.81604e-06	2.81604	0.449639
84	S695	BM	BM Carcinoma planocellulare	preoperative	58	female				4.05119	1.585	2.30036e-05	23.0036	1.3618
85	S698	CTRL	CTRL	preoperative	70	female				2.76325	1.49659	1.66173e-05	16.6173	1.22056
86	S699	BM	BM Carcinoma planocellulare	postoperative	58	female				32.583	5.27625	4.8031e-05	48.031	1.68152
87	S701	BM	BM Carcinoma planocellulare	preoperative	63	female	2			2.53133	1.65399	1.46241e-05	14.6241	1.16507
88	S703	CTRL	CTRL	preoperative	81	female				2.51668	1.0696	2.16991e-05	21.6991	1.33644
89	S709	M	Meningeoma Grade II.	preoperative	72	male				17.5861	1.9575	8.1854e-05	81.854	1.91304
90	S712	M	Meningeoma Grade II.	preoperative	79	female				4.12146	2.22	1.6296e-05	16.296	1.21208
91	S714	GBM	Primary glioblastoma	postoperative	60	male	38			1.18347	1.206	9.81322e-06	9.81322	0.991811
92	S719	GBM	Secondary glioblastoma	preoperative	43	male	2	+	+	9.77017	3.725	2.41886e-05	24.1886	1.38361
93	S721	GBM	Primary glioblastoma	preoperative	74	male				1.56297	1.97	7.40495e-06	7.40495	0.869522
94	S723	BM	BM Carcinoma planocellulare	preoperative	74	male	7			6.08616	2.2075	2.5426e-05	25.426	1.40528
95	S724	CTRL	CTRL	preoperative	72	male				2.61842	1.40916	1.52781e-05	15.2781	1.18407
96	S725	GBM	Secondary glioblastoma	postoperative	43	male	2	+	+	6.26991	1.475	3.82571e-05	38.2571	1.58271
97	S726	CTRL	CTRL	preoperative	49	male				3.138	1.90989	1.38745e-05	13.8745	1.14222
98	S727	BM	BM Carcinoma planocellulare	preoperative	55	male	0			2.43925	2.2325	1.01977e-05	10.1977	1.0085
99	S733	M	Meningeoma Grade I.	preoperative	52	male				4.92401	2.0325	2.26113e-05	22.6113	1.35433
100	S737	CTRL	CTRL	preoperative	42	female				2.84525	2.43	1.04079e-05	10.4079	1.01736
101	S742	CTRL	CTRL	preoperative	45	male				3.88608	2.115	1.57199e-05	15.7199	1.19645
102	S743	CTRL	CTRL	preoperative	41	female				3.65613	2.39	1.37678e-05	13.7678	1.13887
103	S744	M	Meningeoma Grade II.	preoperative	68	female	1			5.19529	1.57	3.05173e-05	30.5173	1.48455
104	S746	M	Meningeoma Grade I.	preoperative	60	female				5.38655	2.97	1.69274e-05	16.9274	1.22859
105	S748	CTRL	CTRL	preoperative	60	male				10.7079	2.34	4.11844e-05	41.1844	1.61473
106	S749	CTRL	CTRL	preoperative	61	male				1.55387	2.89	5.01827e-06	5.01827	0.700554
107	S750	GBM	Primary glioblastoma	preoperative	73	female				0.886812	2.6075	3.17427e-06	3.17427	0.501644
108	S751	GBM	Primary glioblastoma	preoperative	73	male				6.04898	1.616	3.32727e-05	33.2727	1.52209
109	S752	GBM	Primary glioblastoma	postoperative	73	male				6.04861	1.44	3.82705e-05	38.2705	1.58286
110	S755	CTRL	CTRL	preoperative	69	female				0.927077	1.365	6.18806e-06	6.18806	0.791554
111	S756	GBM	Secondary glioblastoma	postoperative	43	female	56			5.10195	1.77757	2.61506e-05	26.1506	1.41748
112	S759	BM	BM adenocarcinoma	preoperative	66	male				5.15785	2.40236	1.98001e-05	19.8001	1.29667
113	S761	M	Meningeoma Grade I.	preoperative	64	female				8.3181	2.053	3.73655e-05	37.3655	1.57247
114	S767	GBM	Primary glioblastoma	preoperative	67	female				4.60812	1.8575	2.2603e-05	22.603	1.35417
115	S770	GBM	Primary glioblastoma	preoperative	33	female			+	2.03713	1.795	1.05923e-05	10.5923	1.02499
116	S771	GBM	Primary glioblastoma	postoperative	33	female			+	2.14313	2.26	8.85069e-06	8.85069	0.946977
117	S772	GBM	Secondary glioblastoma	preoperative	29	male				2.80503	1.7325	1.61906e-05	16.1906	1.20926
118	S774	GBM	Secondary glioblastoma	postoperative	29	male	13			4.09469	1.18	3.16163e-05	31.6163	1.49991
119	S775	CTRL	CTRL	preoperative	75	male	-			2.08966	1.6825	1.2006e-05	12.006	1.0794
120	S776	GBM	Primary glioblastoma	preoperative	47	male	21			10.8636	4.135	2.42289e-05	24.2289	1.38433
121	S777	M	Meningeoma Grade II.	preoperative	60	female	47			7.17775	2.0075	3.45628e-05	34.5628	1.53861
122	S780	CTRL	CTRL	preoperative	51	female				2.57594	1.6325	1.50778e-05	15.0778	1.17834
123	S781	CTRL	CTRL	preoperative	70	female				4.27467	1.7325	2.33027e-05	23.3027	1.36741
124	S784	GBM	Primary glioblastoma	preoperative	77	female				4.16887	1.545	2.51841e-05	25.1841	1.40113
125	S785	CTRL	CTRL	preoperative	60	male				2.00821	1.595	1.17513e-05	11.7513	1.07008
126	S787	CTRL	CTRL	preoperative	39	male				6.46062	1.645	3.70924e-05	37.0924	1.56928
127	S790	CTRL	CTRL	preoperative	53	female				2.7142	1.9325	1.31087e-05	13.1087	1.11756
128	S792	CTRL	CTRL	preoperative	55	male				2.76989	2.2575	1.11791e-05	11.1791	1.04841
129	S795	GBM	Primary glioblastoma	preoperative	65	male				3.78365	2.2075	1.56164e-05	15.6164	1.19358
130	S798	GBM	Primary glioblastoma	preoperative	69	female	17	+		4.80195	2.04373	2.21907e-05	22.1907	1.34617
131	S800	GBM	Primary glioblastoma	postoperative	69	female	17	+		6.3773	0.755	7.88363e-05	78.8363	1.89673
132	S803	GBM	Primary glioblastoma	preoperative	63	female				4.24667	1.9325	2.07542e-05	20.7542	1.31711
133	S807	CTRL	CTRL	preoperative	43	female				3.20791	2.02	1.46456e-05	14.6456	1.16571
134	S808	GBM	Primary glioblastoma	preoperative	66	male				4.15213	2.0075	1.93042e-05	19.3042	1.28565
135	S809	BM	BM adenocarcinoma	preoperative	71	male				3.62183	1.4499	2.3592e-05	23.592	1.37277
136	S813	GBM	Primary glioblastoma	preoperative	73	male	1			4.57698	1.09761	3.84561e-05	38.4561	1.58497
137	S819	M	Meningeoma Grade I.	preoperative	64	female				3.1089	1.97	1.47292e-05	14.7292	1.16818
138	S820	BM	BM adenocarcinoma	preoperative	71	female				7.08393	1.701	3.37132e-05	33.7132	1.5278
139	S823	GBM	Secondary glioblastoma	preoperative	50	male	11	+	+	8.17606	3.385	2.22752e-05	22.2752	1.34782
140	S824	CTRL	CTRL	preoperative	29	male				2.9653	1.67	1.65725e-05	16.5725	1.21939
141	S826	GBM	Secondary glioblastoma	postoperative	50	male	11	+	+	19.0791	1.69	0.000101604	101.604	2.00691
142	S827	GBM	Primary glioblastoma	preoperative	45	male	8			7.1452	1.23683	5.26351e-05	52.6351	1.72128
143	S829	GBM	Primary glioblastoma	preoperative	43	female	23			3.76195	1.42	2.38434e-05	23.8434	1.37737
144	S831	GBM	Primary glioblastoma	preoperative	69	female	1	+	+	1.97533	1.59	1.13191e-05	11.3191	1.05381
145	S832	GBM	Primary glioblastoma	preoperative	65	male	19			3.29711	4.2	7.23969e-06	7.23969	0.85972
146	S833	GBM	Primary glioblastoma	postoperative	69	female	1	+	+	2.6221	1.33	1.84007e-05	18.4007	1.26483
147	S835	GBM	Primary glioblastoma	preoperative	61	male	29	+	+	1.82643	2.99	5.70124e-06	5.70124	0.755969
148	S838	GBM	Primary glioblastoma	postoperative	61	male	29	+	+	12.6352	0.745	0.000150756	150.756	2.17827
149	S842	BM	BM adenocarcinoma	preoperative	51	male				10.3697	1.9325	4.82937e-05	48.2937	1.68389
150	S846	BM	BM adenocarcinoma	postoperative	51	male				14.4024	1.8075	6.90573e-05	69.0573	1.83921
151	S855	GBM	Primary glioblastoma	preoperative	67	female				3.54601	1.9825	1.60979e-05	16.0979	1.20677
152	S856	GBM	Primary glioblastoma	preoperative	30	male	6	+	+	4.21638	2.07	1.83321e-05	18.3321	1.26321
153	S857	GBM	Primary glioblastoma	postoperative	31	male	6	+	+	5.27038	1.48289	3.19871e-05	31.9871	1.50498
154	S858	GBM	Primary glioblastoma	postoperative	67	female				5.85056	2.705	1.99464e-05	19.9464	1.29987
155	S859	GBM	Primary glioblastoma	preoperative	40	female	15	+		2.54474	2.21	1.03632e-05	10.3632	1.01549
156	S860	GBM	Primary glioblastoma	preoperative	60	female	1	+	+	2.94096	1.955	1.42075e-05	14.2075	1.15252
157	S861	GBM	Primary glioblastoma	preoperative	76	male				2.97232	1.2325	2.00968e-05	20.0968	1.30313
158	S862	GBM	Primary glioblastoma	postoperative	60	female	1	+	+	5.60014	1.59	3.5221e-05	35.221	1.5468
159	S863	GBM	Secondary glioblastoma	preoperative	39	female				1.46496	2.1325	7.46707e-06	7.46707	0.87315
160	S864	GBM	Primary glioblastoma	postoperative	40	female	15	+		3.86718	1.615	2.12848e-05	21.2848	1.32807
161	S865	GBM	Primary glioblastoma	postoperative	76	male				2.52089	1.78	1.32182e-05	13.2182	1.12117
162	S866	GBM	Secondary glioblastoma	postoperative	41	female	78			3.23825	1.635	1.80453e-05	18.0453	1.25636
163	S867	GBM	Primary glioblastoma	preoperative	62	female				3.22681	1.47	1.9756e-05	19.756	1.2957
164	S871	GBM	Primary glioblastoma	postoperative	62	female				4.92206	1.51	2.93368e-05	29.3368	1.46741
165	S874	GBM	Primary glioblastoma	postoperative	59	male	24			12.1347	1.55	6.95896e-05	69.5896	1.84254
166	S875	GBM	Primary glioblastoma	preoperative	66	female	4			3.24427	1.24872	2.59809e-05	25.9809	1.41465
167	S876	GBM	Secondary glioblastoma	preoperative	41	female			+	5.15581	1.6325	2.8775e-05	28.775	1.45901
168	S877	GBM	Primary glioblastoma	preoperative	62	male	7	+	+	3.02244	3.66	7.7075e-06	7.7075	0.886913
169	S878	GBM	Secondary glioblastoma	postoperative	39	female	4		+	32.3465	2.575	0.000114451	114.451	2.05862
170	S879	GBM	Primary glioblastoma	postoperative	62	male	7	+	+	7.14575	0.7325	9.7553e-05	97.553	1.98924
171	S884	GBM	Primary glioblastoma	preoperative	56	male	1			7.68004	1.19269	6.08153e-05	60.8153	1.78401
172	S886	GBM	Primary glioblastoma	preoperative	72	male				3.74868	1.4325	2.35519e-05	23.5519	1.37203
173	S888	GBM	Primary glioblastoma	postoperative	72	male				10.5339	2.0057	4.72679e-05	47.2679	1.67457
174	S890	GBM	Primary glioblastoma	preoperative	45	male	2			4.83785	2.16382	2.16872e-05	21.6872	1.3362
175	S892	GBM	Primary glioblastoma	postoperative	55	male	10			7.23874	1.44	4.52421e-05	45.2421	1.65554
176	S895	BM	BM adenocarcinoma	preoperative	64	male				9.03002	1.97706	4.21215e-05	42.1215	1.6245
177	S896	GBM	Primary glioblastoma	preoperative	64	male	1			6.75915	1.3353	4.66819e-05	46.6819	1.66915
178	S900	GBM	Primary glioblastoma	preoperative	70	female	1		+	3.94812	1.08743	3.59036e-05	35.9036	1.55514
179	S908	GBM	Primary glioblastoma	preoperative	44	female	16			2.40057	3.59	6.24104e-06	6.24104	0.795257
180	S910	GBM	Primary glioblastoma	preoperative	54	female	8			8.50142	1.49065	4.6259e-05	46.259	1.6652
181	S913	GBM	Primary glioblastoma	postoperative	44	female	16		+	3.62019	1.325	2.55007e-05	25.5007	1.40655
182	S914	GBM	Primary glioblastoma	preoperative	72	male	13			5.77318	1.38114	3.85489e-05	38.5489	1.58601
183	S916	GBM	Primary glioblastoma	postoperative	54	female	8			5.54821	2.03	2.4598e-05	24.598	1.3909
184	S919	GBM	Primary glioblastoma	preoperative	74	male	4			18.7742	1.71476	9.73211e-05	97.3211	1.98821
185	S923	GBM	Primary glioblastoma	preoperative	66	male	12		+	2.35084	3.84	6.12199e-06	6.12199	0.786893
186	S924	GBM	Primary glioblastoma	preoperative	49	male	12	+		2.15389	1.59	1.21918e-05	12.1918	1.08607
187	S925	GBM	Primary glioblastoma	postoperative	66	male	12		+	1.65179	1.38783	1.05795e-05	10.5795	1.02446
188	S926	GBM	Primary glioblastoma	postoperative	49	male	11	+		2.22578	1.435	1.37873e-05	13.7873	1.13948
189	S930	GBM	Secondary glioblastoma	preoperative	45	female				2.90061	1.42	1.8838e-05	18.838	1.27504
190	S933	GBM	Primary glioblastoma	preoperative	71	female	3			3.71425	1.76314	1.89595e-05	18.9595	1.27783
191	S934	GBM	Primary glioblastoma	preoperative	48	male	8	+	+	2.5972	4.22	5.67581e-06	5.67581	0.754028
192	S935	GBM	Primary glioblastoma	postoperative	71	female	3			3.36921	2.3	1.30211e-05	13.0211	1.11465
193	S936	GBM	Primary glioblastoma	postoperative	48	male	8	+	+	2.40073	1.285	1.65809e-05	16.5809	1.21961
194	S944	GBM	Primary glioblastoma	preoperative	31	male	17	+		13.8031	2.455	5.12269e-05	51.2269	1.7095
195	S945	GBM	Primary glioblastoma	preoperative	77	male	2			27.2142	1.44599	0.000171475	171.475	2.2342
196	S952	GBM	Primary glioblastoma	preoperative	55	male	8			6.25022	1.495	3.80913e-05	38.0913	1.58083
197	S953	GBM	Primary glioblastoma	preoperative	77	female	1			7.15414	1.4825	4.39677e-05	43.9677	1.64313
198	S954	GBM	Primary glioblastoma	preoperative	82	male	1			4.85432	1.3825	3.12112e-05	31.2112	1.49431
199	S958	CTRL	CTRL	preoperative	60	female				8.00185	2.4575	3.14756e-05	31.4756	1.49797
200	S959	M	Meningeoma Grade II.	preoperative	69	male				4.17548	2.4575	1.60468e-05	16.0468	1.20539
201	S960	GBM	Primary glioblastoma	preoperative	60	male	10	+	+	2.91148	3.635	7.38661e-06	7.38661	0.868445
202	S961	BM	BM adenocarcinoma	preoperative	68	female				2.8283	1.84633	1.48079e-05	14.8079	1.17049
203	S963	GBM	Primary glioblastoma	preoperative	59	male	1			9.21272	1.8575	4.51888e-05	45.1888	1.65503
204	S965	BM	BM adenocarcinoma	postoperative	68	female				8.64131	2.62	3.05084e-05	30.5084	1.48442
205	S966	GBM	Primary glioblastoma	postoperative	55	male	7			10.2106	2.02	4.43693e-05	44.3693	1.64708
206	S970	BM	BM Carcinoma planocellulare	preoperative	63	male				8.88064	1.68	4.81622e-05	48.1622	1.68271
207	S971	CTRL	CTRL	preoperative	68	male				5.85382	1.87	2.95647e-05	29.5647	1.47077
208	S975	BM	BM Carcinoma planocellulare	postoperative	63	male				31.283	5.62	4.82418e-05	48.2418	1.68342
209	S982	CTRL	CTRL	preoperative	57	male				5.71067	1.9825	2.6885e-05	26.885	1.42951
210	S984	BM	BM adenocarcinoma	preoperative	42	male				17.1025	1.73768	8.9673e-05	89.673	1.95266
211	S985	GBM	Primary glioblastoma	preoperative	62	male	0			7.04075	2.1075	3.04384e-05	30.4384	1.48342
212	S987	GBM	Secondary glioblastoma	preoperative	54	male				9.93465	1.52	5.95498e-05	59.5498	1.77488
213	S990	GBM	Secondary glioblastoma	postoperative	54	male	3			6.36478	2.48	2.65199e-05	26.5199	1.42357
214	S993	BM	BM adenocarcinoma	preoperative	44	female				1.06885	1.66722	6.12603e-06	6.12603	0.787179
215	S1005	GBM	Primary glioblastoma	preoperative	49	female	8			10.551	2.3075	4.16602e-05	41.6602	1.61972
216	S1012	GBM	Primary glioblastoma	preoperative	51	male	13			5.08174	1.77	2.55203e-05	25.5203	1.40689
217	S1013	BM	BM adenocarcinoma	preoperative	81	female				3.87891	2.32341	1.55819e-05	15.5819	1.19262
218	S1014	BM	BM adenocarcinoma	preoperative	64	male				11.2675	1.91424	5.42834e-05	54.2834	1.73467
219	S1017	GBM	Primary glioblastoma	preoperative	52	male	5	+	+	5.01116	2.23384	2.01896e-05	20.1896	1.30513
220	S1018	GBM	Primary glioblastoma	preoperative	54	male	31	+	+	2.85612	1.835	1.49717e-05	14.9717	1.17527
221	S1019	GBM	Primary glioblastoma	preoperative	67	female	2			5.6675	1.6825	3.06908e-05	30.6908	1.48701
222	S1020	GBM	Primary glioblastoma	preoperative	51	female	3			4.26659	1.27	3.06089e-05	30.6089	1.48585
